# Supplementary material for: Disease signatures are robust across tissues and experiments
Source: PubMed Central journal article supplement — Mol Syst Biol. 2009 Sep 15;5:307. doi: 10.1038/msb.2009.66 (PMC2758720; doi:10.1038/msb.2009.66), 2009-09-15
Supplement: msb200966-s1.pdf [file msb200966-s1.pdf]

## **Supplementary Information (SI)**

### **SI Materials and Methods**

#### **ROC Analysis of Predictive Power Between Experiments**

ROC Analysis was performed using one of the top-performing methods from the correlation analysis (Subtractive/Centered/SampleMerge=mean). For each pair of experiments (A, B) the values of their respective disease state vectors were converted to ranks. The ability of experiment B to predict experiment A was then quantified using various rank-percentile cutoffs, starting at 5% and moving up by increments of 5%, and counting the number of up-and-down-regulated genes in experiment A predicted by experiment B at the percentile cutoff threshold. We then use trapezoidal integration to compute the raw AUC value for the pair.

#### **Evaluating the Effect of Semantic Annotation Distance and Biological Concordance**

For each pair of experiments in the data set (A, B) the UMLS concept hierarchy table (MRHIER) was queried to determine the paths from the tissue terms annotating A and B to the root of the hierarchy. The semantic distance was then calculated as the number of traversals required to reach a common parent concept between the tissue terms annotating A and B. In cases where there was more than one path to the root of the concept hierarchy, the path offering the nearest common parent concept was used.

## **Statistical Analyses**

All statistical analyses were conducted using the R language interpreter version 2.7.2 (<http://www.R-project.org>). Spearman correlation values were converted z-scores using the Fisher transformation prior to hypothesis testing. The difference in the means of z-transformed correlations across the four disease categories was evaluated using one-way ANOVA. The pair-wise differences in z-transformed correlation distributions between the four disease/tissue categories were evaluated using Tukey's HSD to maintain the same family-wise error rate across multiple comparisons.

## Supplementary Table S1

| Normalize  | Collapse Probes | Aggregate Arrays | Disease vs. Control | D+/T+ $\bar{x}(rs)$ | D+/T+ $\bar{x}(p)$ | D+/T- $\bar{x}(rs)$ | D+/T- $\bar{x}(p)$ | D-/T+ $\bar{x}(rs)$ | D-/T+ $\bar{x}(p)$ | D-/T- $\bar{x}(rs)$ | D-/T- $\bar{x}(p)$ | ANOVA p-value |
|------------|-----------------|------------------|---------------------|---------------------|--------------------|---------------------|--------------------|---------------------|--------------------|---------------------|--------------------|---------------|
| CenterNorm | NoCollapse      | NoAggregate      | SubtractiveDiff     | 2.19E-01            | 8.03E-22           | 5.63E-02            | 1.62E-09           | 4.29E-02            | 1.01E-07           | 6.60E-03            | 5.84E-03           | 0.00E+00      |
| CenterNorm | MeanCollapse    | MeanAggregate    | SubtractiveDiff     | 2.19E-01            | 8.03E-22           | 5.58E-02            | 1.62E-09           | 4.26E-02            | 1.12E-07           | 6.52E-03            | 5.79E-03           | 0.00E+00      |
| CenterNorm | NoCollapse      | NoAggregate      | SubtractiveDiff     | 2.19E-01            | 8.03E-22           | 5.63E-02            | 1.62E-09           | 4.29E-02            | 1.01E-07           | 6.60E-03            | 5.84E-03           | 0.00E+00      |
| CenterNorm | MeanCollapse    | NoAggregate      | SubtractiveDiff     | 2.19E-01            | 8.03E-22           | 5.61E-02            | 1.62E-09           | 4.29E-02            | 1.20E-07           | 6.60E-03            | 5.83E-03           | 0.00E+00      |
| CenterNorm | MeanCollapse    | NoAggregate      | SubtractiveDiff     | 2.19E-01            | 8.03E-22           | 5.61E-02            | 1.62E-09           | 4.29E-02            | 1.20E-07           | 6.60E-03            | 5.83E-03           | 0.00E+00      |
| CenterNorm | NoCollapse      | MeanAggregate    | SubtractiveDiff     | 2.19E-01            | 8.03E-22           | 5.58E-02            | 1.62E-09           | 4.26E-02            | 1.12E-07           | 6.51E-03            | 5.79E-03           | 0.00E+00      |
| NoNorm     | MeanCollapse    | NoAggregate      | SubtractiveDiff     | 2.17E-01            | 8.45E-24           | 5.98E-02            | 1.05E-07           | 4.24E-02            | 2.86E-07           | 5.96E-03            | 9.15E-03           | 0.00E+00      |
| NoNorm     | NoCollapse      | NoAggregate      | SubtractiveDiff     | 2.17E-01            | 8.45E-24           | 5.98E-02            | 1.05E-07           | 4.27E-02            | 2.86E-07           | 6.00E-03            | 9.22E-03           | 0.00E+00      |
| NoNorm     | NoCollapse      | MeanAggregate    | SubtractiveDiff     | 2.17E-01            | 6.65E-24           | 5.87E-02            | 1.05E-07           | 4.23E-02            | 3.44E-07           | 5.96E-03            | 9.09E-03           | 0.00E+00      |
| NoNorm     | MeanCollapse    | NoAggregate      | SubtractiveDiff     | 2.17E-01            | 8.45E-24           | 5.98E-02            | 1.05E-07           | 4.24E-02            | 2.86E-07           | 5.96E-03            | 9.15E-03           | 0.00E+00      |
| NoNorm     | MeanCollapse    | MeanAggregate    | SubtractiveDiff     | 2.17E-01            | 7.20E-24           | 5.87E-02            | 1.05E-07           | 4.23E-02            | 3.89E-07           | 5.98E-03            | 9.15E-03           | 0.00E+00      |
| NoNorm     | NoCollapse      | NoAggregate      | SubtractiveDiff     | 2.17E-01            | 8.45E-24           | 5.98E-02            | 1.05E-07           | 4.27E-02            | 2.86E-07           | 6.00E-03            | 9.22E-03           | 0.00E+00      |
| RankNorm   | NoCollapse      | MeanAggregate    | SubtractiveDiff     | 1.98E-01            | 0.00E+00           | 4.72E-02            | 4.36E-05           | 3.50E-02            | 1.90E-04           | 6.01E-03            | 5.14E-02           | 0.00E+00      |
| RankNorm   | MeanCollapse    | MeanAggregate    | SubtractiveDiff     | 1.95E-01            | 0.00E+00           | 4.72E-02            | 4.68E-05           | 3.50E-02            | 1.90E-04           | 6.03E-03            | 5.15E-02           | 0.00E+00      |
| RankNorm   | MeanCollapse    | NoAggregate      | SubtractiveDiff     | 1.95E-01            | 0.00E+00           | 4.56E-02            | 5.68E-05           | 3.63E-02            | 1.90E-04           | 5.97E-03            | 5.12E-02           | 0.00E+00      |
| RankNorm   | MeanCollapse    | NoAggregate      | SubtractiveDiff     | 1.95E-01            | 0.00E+00           | 4.56E-02            | 5.68E-05           | 3.63E-02            | 1.90E-04           | 5.97E-03            | 5.12E-02           | 0.00E+00      |
| RankNorm   | NoCollapse      | NoAggregate      | SubtractiveDiff     | 1.95E-01            | 0.00E+00           | 4.60E-02            | 5.68E-05           | 3.63E-02            | 1.90E-04           | 5.97E-03            | 5.10E-02           | 0.00E+00      |
| RankNorm   | NoCollapse      | NoAggregate      | SubtractiveDiff     | 1.95E-01            | 0.00E+00           | 4.60E-02            | 5.68E-05           | 3.63E-02            | 1.90E-04           | 5.97E-03            | 5.10E-02           | 0.00E+00      |
| CenterNorm | MeanCollapse    | MedianAggregate  | SubtractiveDiff     | 1.90E-01            | 1.45E-15           | 5.58E-02            | 6.06E-08           | 3.38E-02            | 5.70E-06           | 5.87E-03            | 1.15E-02           | 0.00E+00      |
| NoNorm     | MeanCollapse    | MedianAggregate  | SubtractiveDiff     | 1.85E-01            | 1.59E-16           | 4.70E-02            | 1.72E-06           | 3.66E-02            | 9.52E-06           | 5.33E-03            | 1.74E-02           | 0.00E+00      |
| CenterNorm | NoCollapse      | MedianAggregate  | SubtractiveDiff     | 1.79E-01            | 5.20E-13           | 4.60E-02            | 3.22E-06           | 3.16E-02            | 9.52E-06           | 5.42E-03            | 1.87E-02           | 0.00E+00      |
| NoNorm     | NoCollapse      | MedianAggregate  | SubtractiveDiff     | 1.66E-01            | 1.09E-14           | 4.76E-02            | 5.59E-07           | 3.54E-02            | 6.30E-05           | 5.07E-03            | 2.60E-02           | 0.00E+00      |
| RankNorm   | MeanCollapse    | MedianAggregate  | SubtractiveDiff     | 1.65E-01            | 5.33E-15           | 4.51E-02            | 6.39E-05           | 2.55E-02            | 1.95E-03           | 5.25E-03            | 8.13E-02           | 0.00E+00      |
| CenterNorm | MeanCollapse    | MeanAggregate    | FoldDiff            | 1.60E-01            | 4.09E-14           | 2.65E-02            | 5.39E-03           | 3.18E-02            | 1.76E-04           | 4.70E-03            | 5.58E-02           | 0.00E+00      |
| CenterNorm | NoCollapse      | MeanAggregate    | FoldDiff            | 1.60E-01            | 4.09E-14           | 2.65E-02            | 5.39E-03           | 3.16E-02            | 1.89E-04           | 4.69E-03            | 5.52E-02           | 0.00E+00      |
| NoNorm     | NoCollapse      | MeanAggregate    | FoldDiff            | 1.59E-01            | 1.64E-14           | 2.54E-02            | 5.44E-03           | 3.05E-02            | 2.00E-04           | 4.72E-03            | 5.31E-02           | 0.00E+00      |
| NoNorm     | MeanCollapse    | MeanAggregate    | FoldDiff            | 1.59E-01            | 2.38E-14           | 2.54E-02            | 5.44E-03           | 2.96E-02            | 1.89E-04           | 4.60E-03            | 5.34E-02           | 0.00E+00      |
| CenterNorm | MeanCollapse    | NoAggregate      | FoldDiff            | 1.58E-01            | 2.27E-13           | 2.43E-02            | 4.13E-03           | 3.23E-02            | 1.71E-04           | 4.30E-03            | 5.97E-02           | 0.00E+00      |
| CenterNorm | MeanCollapse    | NoAggregate      | FoldDiff            | 1.58E-01            | 2.27E-13           | 2.43E-02            | 4.13E-03           | 3.23E-02            | 1.71E-04           | 4.30E-03            | 5.97E-02           | 0.00E+00      |
| RankNorm   | NoCollapse      | MedianAggregate  | SubtractiveDiff     | 1.56E-01            | 4.67E-12           | 4.10E-02            | 9.58E-04           | 2.46E-02            | 4.62E-03           | 5.17E-03            | 9.58E-02           | 0.00E+00      |
| NoNorm     | MeanCollapse    | NoAggregate      | FoldDiff            | 1.54E-01            | 1.98E-13           | 1.95E-02            | 1.03E-02           | 3.00E-02            | 1.30E-04           | 4.38E-03            | 5.33E-02           | 0.00E+00      |
| NoNorm     | MeanCollapse    | NoAggregate      | FoldDiff            | 1.54E-01            | 1.98E-13           | 1.95E-02            | 1.03E-02           | 3.00E-02            | 1.30E-04           | 4.38E-03            | 5.33E-02           | 0.00E+00      |
| NoNorm     | NoCollapse      | NoAggregate      | FoldDiff            | 1.52E-01            | 2.99E-12           | 1.79E-02            | 1.26E-02           | 2.91E-02            | 5.37E-04           | 4.13E-03            | 7.07E-02           | 0.00E+00      |
| NoNorm     | NoCollapse      | NoAggregate      | FoldDiff            | 1.52E-01            | 2.99E-12           | 1.79E-02            | 1.26E-02           | 2.91E-02            | 5.37E-04           | 4.13E-03            | 7.07E-02           | 0.00E+00      |
| CenterNorm | NoCollapse      | NoAggregate      | FoldDiff            | 1.52E-01            | 7.08E-12           | 2.12E-02            | 1.15E-02           | 3.15E-02            | 4.49E-04           | 4.01E-03            | 7.41E-02           | 0.00E+00      |
| CenterNorm | NoCollapse      | NoAggregate      | FoldDiff            | 1.52E-01            | 7.08E-12           | 2.12E-02            | 1.15E-02           | 3.15E-02            | 4.49E-04           | 4.01E-03            | 7.41E-02           | 0.00E+00      |
| NoNorm     | MeanCollapse    | MedianAggregate  | FoldDiff            | 1.52E-01            | 1.37E-11           | 2.27E-02            | 3.91E-03           | 2.38E-02            | 2.24E-03           | 4.29E-03            | 7.27E-02           | 0.00E+00      |
| CenterNorm | MeanCollapse    | MedianAggregate  | FoldDiff            | 1.50E-01            | 4.98E-11           | 2.47E-02            | 2.65E-03           | 2.35E-02            | 2.48E-03           | 4.08E-03            | 7.62E-02           | 0.00E+00      |
| NoNorm     | MeanCollapse    | MaxAggregate     | SubtractiveDiff     | 1.41E-01            | 1.99E-10           | 3.71E-02            | 1.17E-03           | 2.84E-02            | 4.72E-04           | 6.81E-03            | 3.43E-02           | 5.35E-319     |

|            |              |                 |                 |          |          |          |          |          |          |          |          |           |
|------------|--------------|-----------------|-----------------|----------|----------|----------|----------|----------|----------|----------|----------|-----------|
| CenterNorm | NoCollapse   | MedianAggregate | FoldDiff        | 1.36E-01 | 8.12E-10 | 1.94E-02 | 1.77E-02 | 2.29E-02 | 5.37E-03 | 3.99E-03 | 9.76E-02 | 0.00E+00  |
| NoNorm     | NoCollapse   | MaxAggregate    | SubtractiveDiff | 1.36E-01 | 5.10E-09 | 3.85E-02 | 2.72E-03 | 2.66E-02 | 7.91E-04 | 6.38E-03 | 4.29E-02 | 2.53E-307 |
| NoNorm     | NoCollapse   | MedianAggregate | FoldDiff        | 1.34E-01 | 2.63E-10 | 2.11E-02 | 8.57E-03 | 2.26E-02 | 3.77E-03 | 4.03E-03 | 9.16E-02 | 0.00E+00  |
| CenterNorm | MeanCollapse | MaxAggregate    | SubtractiveDiff | 1.32E-01 | 7.50E-10 | 3.49E-02 | 1.14E-03 | 2.57E-02 | 1.15E-04 | 6.25E-03 | 2.62E-02 | 1.14E-271 |
| CenterNorm | NoCollapse   | MaxAggregate    | SubtractiveDiff | 1.27E-01 | 2.56E-09 | 3.31E-02 | 1.88E-03 | 2.28E-02 | 2.84E-04 | 5.98E-03 | 3.40E-02 | 2.90E-262 |
| CenterNorm | MeanCollapse | MaxAggregate    | FoldDiff        | 1.21E-01 | 3.83E-07 | 2.36E-02 | 1.11E-02 | 2.24E-02 | 3.09E-03 | 4.99E-03 | 9.22E-02 | 0.00E+00  |
| NoNorm     | MeanCollapse | MaxAggregate    | FoldDiff        | 1.17E-01 | 6.47E-08 | 2.23E-02 | 1.52E-02 | 2.24E-02 | 2.71E-03 | 4.59E-03 | 8.71E-02 | 0.00E+00  |
| NoNorm     | NoCollapse   | MaxAggregate    | FoldDiff        | 1.15E-01 | 1.51E-07 | 2.48E-02 | 1.24E-02 | 2.08E-02 | 3.85E-03 | 4.36E-03 | 1.01E-01 | 0.00E+00  |
| CenterNorm | MeanCollapse | MinAggregate    | SubtractiveDiff | 1.15E-01 | 4.79E-07 | 3.23E-02 | 1.02E-03 | 3.02E-02 | 5.55E-05 | 3.64E-03 | 2.97E-02 | 8.10E-233 |
| CenterNorm | NoCollapse   | MaxAggregate    | FoldDiff        | 1.13E-01 | 7.75E-07 | 2.70E-02 | 1.03E-02 | 2.27E-02 | 5.69E-03 | 4.69E-03 | 1.07E-01 | 0.00E+00  |
| RankNorm   | MeanCollapse | MaxAggregate    | SubtractiveDiff | 1.05E-01 | 4.64E-06 | 3.45E-02 | 9.79E-03 | 2.25E-02 | 1.58E-02 | 4.85E-03 | 1.28E-01 | 0.00E+00  |
| RankNorm   | MeanCollapse | MeanAggregate   | FoldDiff        | 1.03E-01 | 2.21E-06 | 2.93E-02 | 8.33E-03 | 1.92E-02 | 1.81E-02 | 4.14E-03 | 1.33E-01 | 0.00E+00  |
| RankNorm   | NoCollapse   | MeanAggregate   | FoldDiff        | 1.03E-01 | 2.21E-06 | 2.92E-02 | 8.33E-03 | 1.92E-02 | 1.78E-02 | 4.15E-03 | 1.33E-01 | 0.00E+00  |
| RankNorm   | NoCollapse   | MaxAggregate    | SubtractiveDiff | 1.02E-01 | 2.42E-05 | 3.13E-02 | 2.04E-02 | 2.18E-02 | 1.70E-02 | 4.24E-03 | 1.31E-01 | 0.00E+00  |
| NoNorm     | MeanCollapse | MinAggregate    | SubtractiveDiff | 9.91E-02 | 4.38E-05 | 3.14E-02 | 2.19E-03 | 2.11E-02 | 5.24E-04 | 2.89E-03 | 3.69E-02 | 3.61E-204 |
| RankNorm   | MeanCollapse | NoAggregate     | FoldDiff        | 9.45E-02 | 6.53E-06 | 2.80E-02 | 6.52E-03 | 1.75E-02 | 2.42E-02 | 3.54E-03 | 1.47E-01 | 0.00E+00  |
| RankNorm   | MeanCollapse | NoAggregate     | FoldDiff        | 9.45E-02 | 6.53E-06 | 2.80E-02 | 6.52E-03 | 1.75E-02 | 2.42E-02 | 3.54E-03 | 1.47E-01 | 0.00E+00  |
| CenterNorm | NoCollapse   | MinAggregate    | SubtractiveDiff | 9.41E-02 | 5.14E-05 | 2.46E-02 | 1.41E-02 | 2.44E-02 | 1.67E-03 | 3.19E-03 | 6.56E-02 | 8.79E-210 |
| RankNorm   | NoCollapse   | NoAggregate     | FoldDiff        | 9.32E-02 | 1.38E-05 | 2.45E-02 | 9.53E-03 | 1.80E-02 | 2.75E-02 | 3.43E-03 | 1.58E-01 | 0.00E+00  |
| RankNorm   | NoCollapse   | NoAggregate     | FoldDiff        | 9.32E-02 | 1.38E-05 | 2.45E-02 | 9.53E-03 | 1.80E-02 | 2.75E-02 | 3.43E-03 | 1.58E-01 | 0.00E+00  |
| RankNorm   | MeanCollapse | MinAggregate    | SubtractiveDiff | 8.37E-02 | 3.99E-05 | 2.36E-02 | 2.36E-02 | 1.88E-02 | 3.50E-02 | 2.90E-03 | 1.60E-01 | 0.00E+00  |
| RankNorm   | MeanCollapse | MedianAggregate | FoldDiff        | 7.88E-02 | 6.69E-04 | 2.26E-02 | 2.68E-02 | 1.56E-02 | 4.75E-02 | 3.45E-03 | 1.75E-01 | 0.00E+00  |
| NoNorm     | NoCollapse   | MinAggregate    | SubtractiveDiff | 7.80E-02 | 3.50E-04 | 2.27E-02 | 5.95E-03 | 1.78E-02 | 5.45E-03 | 2.55E-03 | 7.38E-02 | 1.08E-189 |
| RankNorm   | NoCollapse   | MinAggregate    | SubtractiveDiff | 7.39E-02 | 4.69E-04 | 1.86E-02 | 3.49E-02 | 1.56E-02 | 6.19E-02 | 2.55E-03 | 2.01E-01 | 0.00E+00  |
| CenterNorm | MeanCollapse | MinAggregate    | FoldDiff        | 7.31E-02 | 7.05E-04 | 1.73E-02 | 2.16E-02 | 1.93E-02 | 1.56E-02 | 2.21E-03 | 1.28E-01 | 1.88E-246 |
| NoNorm     | MeanCollapse | MinAggregate    | FoldDiff        | 7.21E-02 | 1.47E-03 | 1.70E-02 | 2.61E-02 | 1.37E-02 | 2.08E-02 | 2.19E-03 | 1.18E-01 | 2.72E-187 |
| RankNorm   | NoCollapse   | MedianAggregate | FoldDiff        | 7.19E-02 | 1.90E-03 | 2.44E-02 | 2.95E-02 | 1.57E-02 | 6.68E-02 | 3.49E-03 | 1.89E-01 | 0.00E+00  |
| RankNorm   | MeanCollapse | MaxAggregate    | FoldDiff        | 6.17E-02 | 7.92E-03 | 1.68E-02 | 1.19E-01 | 1.23E-02 | 4.83E-02 | 3.11E-03 | 1.57E-01 | 2.34E-224 |
| RankNorm   | NoCollapse   | MaxAggregate    | FoldDiff        | 5.72E-02 | 1.63E-02 | 1.51E-02 | 1.24E-01 | 1.12E-02 | 6.48E-02 | 2.81E-03 | 1.64E-01 | 1.61E-195 |
| NoNorm     | NoCollapse   | MinAggregate    | FoldDiff        | 5.18E-02 | 8.94E-03 | 1.03E-02 | 6.50E-02 | 1.07E-02 | 5.54E-02 | 1.51E-03 | 1.85E-01 | 1.33E-164 |
| CenterNorm | NoCollapse   | MinAggregate    | FoldDiff        | 5.01E-02 | 9.46E-03 | 1.03E-02 | 9.47E-02 | 1.35E-02 | 6.26E-02 | 1.46E-03 | 1.95E-01 | 2.47E-210 |
| RankNorm   | MeanCollapse | MinAggregate    | FoldDiff        | 4.30E-02 | 5.88E-02 | 1.19E-02 | 1.13E-01 | 7.11E-03 | 1.47E-01 | 2.43E-03 | 2.18E-01 | 6.83E-165 |
| CenterNorm | NoCollapse   | NoAggregate     | TtestDiff       | 3.83E-02 | 6.69E-02 | 1.07E-02 | 1.30E-01 | 8.13E-03 | 1.48E-01 | 1.14E-03 | 2.76E-01 | 2.74E-178 |
| CenterNorm | NoCollapse   | NoAggregate     | TtestDiff       | 3.83E-02 | 6.69E-02 | 1.07E-02 | 1.30E-01 | 8.13E-03 | 1.48E-01 | 1.14E-03 | 2.76E-01 | 2.74E-178 |
| RankNorm   | NoCollapse   | MinAggregate    | FoldDiff        | 3.82E-02 | 7.13E-02 | 1.19E-02 | 1.90E-01 | 6.66E-03 | 1.94E-01 | 1.85E-03 | 2.83E-01 | 4.69E-159 |
| NoNorm     | NoCollapse   | NoAggregate     | TtestDiff       | 3.58E-02 | 7.05E-02 | 1.22E-02 | 1.68E-01 | 6.62E-03 | 1.74E-01 | 6.08E-04 | 2.85E-01 | 1.33E-154 |
| NoNorm     | NoCollapse   | NoAggregate     | TtestDiff       | 3.58E-02 | 7.05E-02 | 1.22E-02 | 1.68E-01 | 6.62E-03 | 1.74E-01 | 6.08E-04 | 2.85E-01 | 1.33E-154 |
| CenterNorm | MeanCollapse | NoAggregate     | TtestDiff       | 3.21E-02 | 9.79E-02 | 1.06E-02 | 3.74E-01 | 7.05E-03 | 1.66E-01 | 1.33E-03 | 2.94E-01 | 3.11E-103 |
| CenterNorm | MeanCollapse | NoAggregate     | TtestDiff       | 3.21E-02 | 9.79E-02 | 1.06E-02 | 3.74E-01 | 7.05E-03 | 1.66E-01 | 1.33E-03 | 2.94E-01 | 3.11E-103 |
| NoNorm     | MeanCollapse | NoAggregate     | TtestDiff       | 3.07E-02 | 8.45E-02 | 1.32E-02 | 1.33E-01 | 5.31E-03 | 1.56E-01 | 5.89E-04 | 2.96E-01 | 9.67E-80  |
| NoNorm     | MeanCollapse | NoAggregate     | TtestDiff       | 3.07E-02 | 8.45E-02 | 1.32E-02 | 1.33E-01 | 5.31E-03 | 1.56E-01 | 5.89E-04 | 2.96E-01 | 9.67E-80  |
| RankNorm   | NoCollapse   | NoAggregate     | TtestDiff       | 2.70E-02 | 1.90E-01 | 5.25E-03 | 3.07E-01 | 4.86E-03 | 3.21E-01 | 5.11E-04 | 3.81E-01 | 8.39E-105 |
| RankNorm   | NoCollapse   | NoAggregate     | TtestDiff       | 2.70E-02 | 1.90E-01 | 5.25E-03 | 3.07E-01 | 4.86E-03 | 3.21E-01 | 5.11E-04 | 3.81E-01 | 8.39E-105 |

|          |              |             |           |          |          |          |          |          |          |          |          |          |
|----------|--------------|-------------|-----------|----------|----------|----------|----------|----------|----------|----------|----------|----------|
| RankNorm | MeanCollapse | NoAggregate | TtestDiff | 2.21E-02 | 2.15E-01 | 8.65E-04 | 3.97E-01 | 3.81E-03 | 3.73E-01 | 3.02E-04 | 4.35E-01 | 1.30E-35 |
| RankNorm | MeanCollapse | NoAggregate | TtestDiff | 2.21E-02 | 2.15E-01 | 8.65E-04 | 3.97E-01 | 3.81E-03 | 3.73E-01 | 3.02E-04 | 4.35E-01 | 1.30E-35 |

**Figure S1**

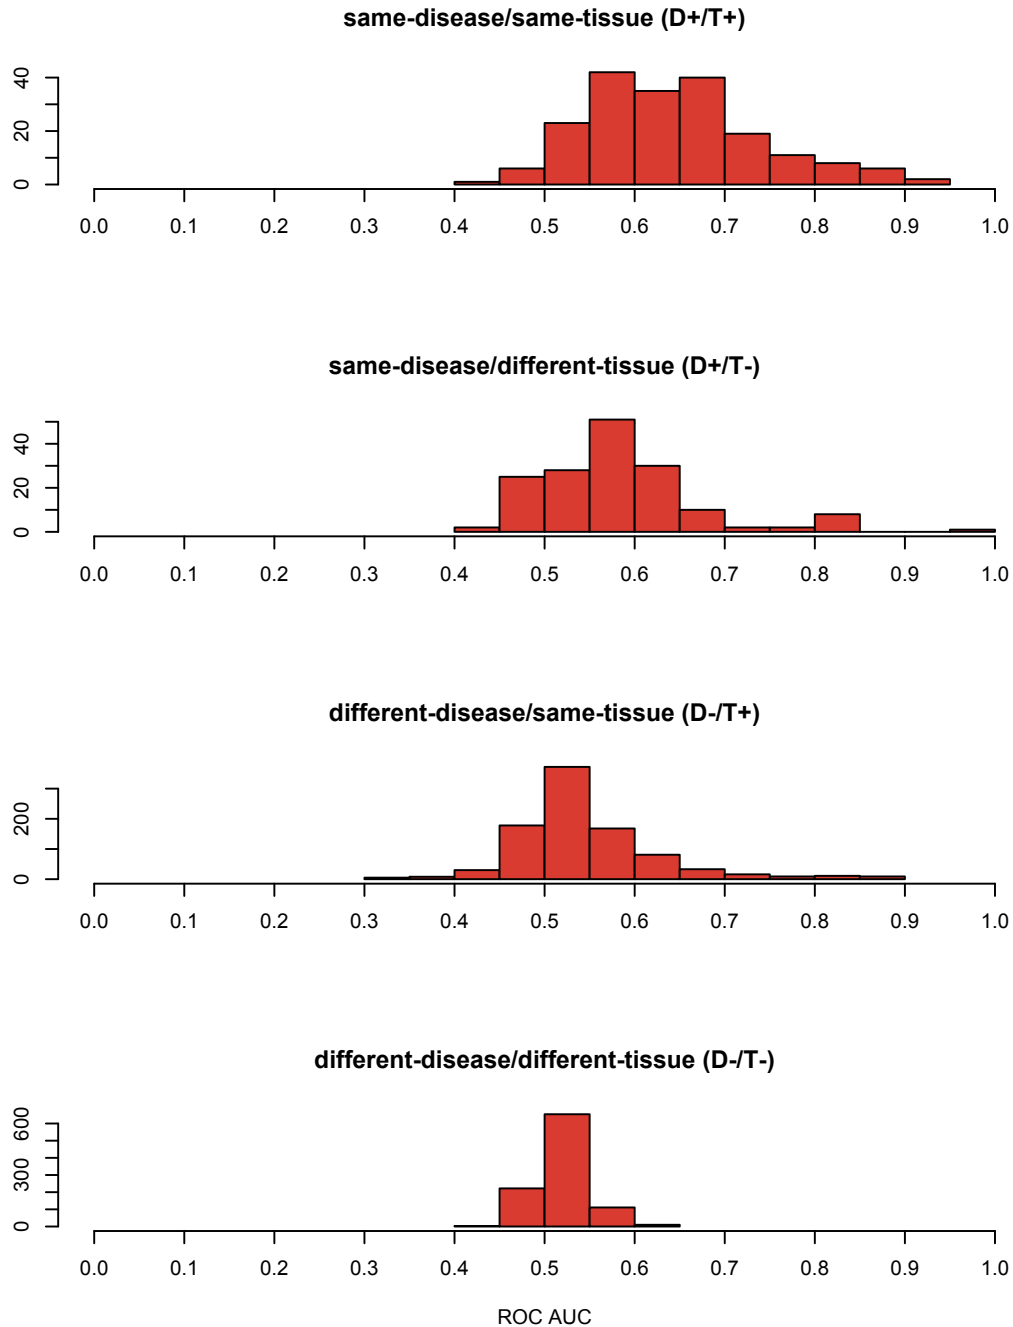

Distributions of raw Receiver Operating Characteristic (ROC) Area Under Curve (AUC) values within each disease/tissue category. For each pair of experiments A and B, the AUC was computed based on the ability of experiment B to predict the percentile of genes in experiment A. Biologically mismatched experiments (D-/T-) performed similar to a random classifier, however D+/T+, D+/T- and D-/T+ performed significantly better than random (t-test p-values  $< 2.2 \times 10^{-16}$ ). We also observe that the distribution of the AUC values for the D+/T- category is significantly differentiated above that of the D-/T+ category (t-test p-value  $9.35 \times 10^{-07}$ ).

**Figure S2**

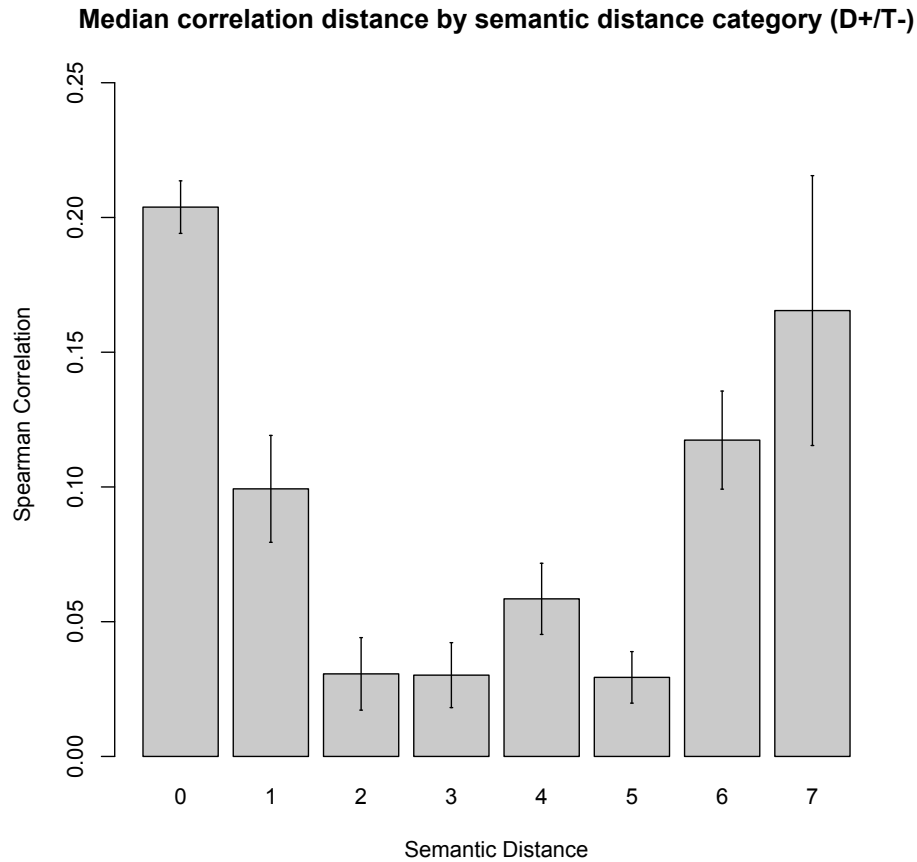

Mean Spearman correlation for each semantic distance category between tissue terms. The semantic distance between tissue terms is computed as the minimum number of traversals up the ontology hierarchy required to reach a common parent term. As expected, experiments measuring the same tissue (Semantic Distance = 0) exhibit the highest mean correlation. Importantly, the semantic distance does not appear to have a bearing on the correlation value between dissimilar tissues, and therefore we can assert that the annotation scheme does not confound interpretation of the results.

**Figure S3**

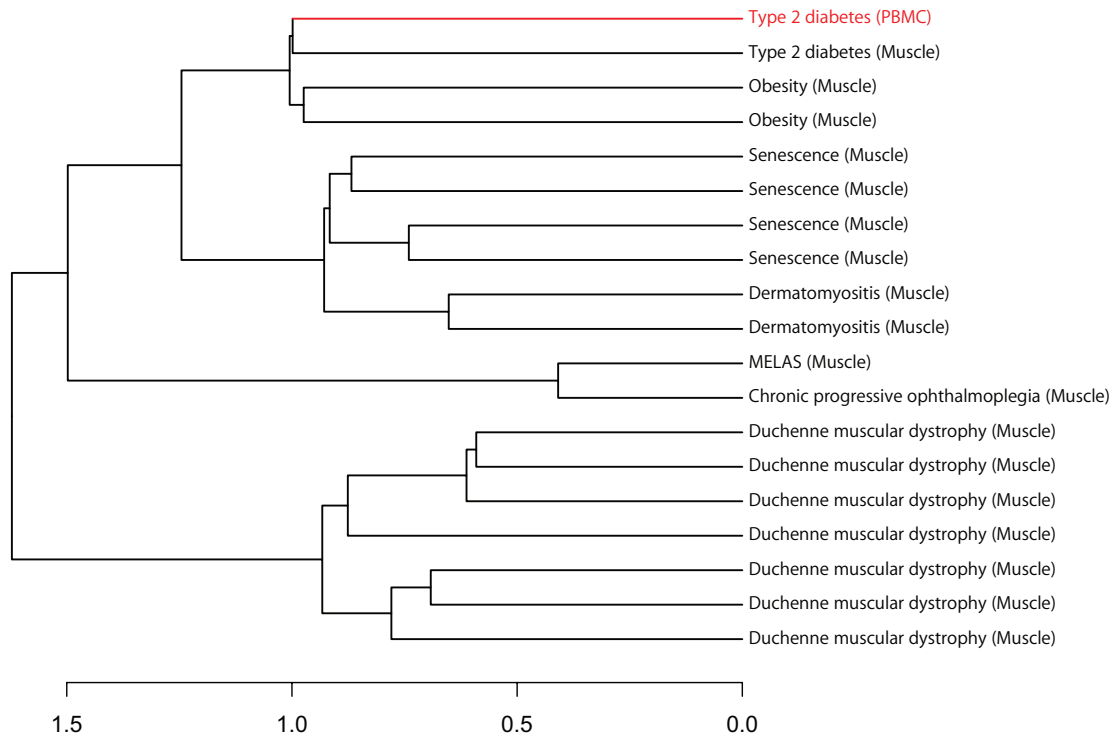

Hierarchical clustering of multiple microarray experiments measuring various disease states in skeletal muscle integrated with an experiment from peripheral blood. The experiments are clustered using the correlation distance of the full disease-state transcriptomes. The diseases cluster consistently within-tissue according to the disease state. Integration of the Type 2 diabetes experiment (GSE9006) measured in peripheral blood (red) results in the clustering of both Type 2 diabetes experiments across-tissue.
